# Supplementary material
Source: Springer Nature journal article supplement (https://www.springermedizin.de/resource/supplementary/12936_2012_2190_MOESM1_ESM.pdf/9542728)
Supplement: MOESM1 [file 9542728]

Households selected for surveillance  
N=1036

Households selected with at least one week of  
bed net ownership/use information  
N=1033

Households never reporting owning a bed net  
during the study period  
N=405 or 39.2%  
Mean (SD) follow-up weeks **22.6 (4.6)**

Households reporting owning a bed net at least  
once during the study period  
N=628 or 60.8%  
Mean (SD) follow-up weeks **23.3 (3.2)**

Households reporting owning a bed net **at first visit**  
N=488 or 77.7%  
Mean (SD) follow-up weeks **23.3 (3.2)**  
Mean (SD) weeks reporting bed net use **19.6 (8.5)**

Households reporting owning a bed net **after first visit**  
N=140 or 22.3%  
Mean (SD) follow-up weeks **23.3 (2.4)**  
Mean (SD) weeks reporting bed net use **16.7 (7.7)**
